# Supplementary material for: Chemopreventive effect of 4′-hydroxychalcone on intestinal tumorigenesis in ApcMin mice
Source: PubMed Central journal article supplement — Oncol Lett. 2021 Jan 18;21(3):213. doi: 10.3892/ol.2021.12474 (PMC7836395; doi:10.3892/ol.2021.12474), 2021-01-18

Figure S1. Toxicity analysis of 4-HC in C57BL/6 mice. C57BL/6 mice were orally administrated with Veh or gradient doses of 4-HC (5, 10 or 20 mg/kg/day) from 4 to 12 weeks of age (treatment duration, 8 weeks). A total of 3 male C57/BL6 mice were used in each treatment group and their body weight was monitored twice per week. (A) Mice body weight change over time. (B) Mice body weight at the 12-week endpoint. 4-HC, 4'-hydroxychalcone; Veh, vehicle.

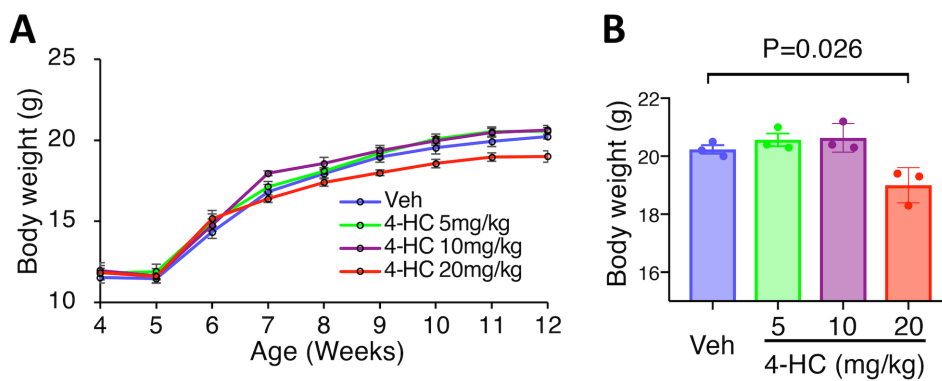

Supplement: Supplementary_Data.pdf [file Supplementary_Data.pdf]
